# Supplementary material for: Autoimmune susceptibility gene PTPN2 is required for clearance of adherent-invasive Escherichia coli by integrating bacterial uptake and lysosomal defence
Source: HighWire-hosted journal article supplement (doi:10.1136/gutjnl-2020-323636), 2021-02-09
Supplement: gutjnl-2020-323636supp001_data_supplement.pdf [file gutjnl-2020-323636supp001_data_supplement.pdf]

## Supplementary material to

### **The autoimmune susceptibility gene *PTPN2* is required for clearance of adherent-invasive *E. coli* by integrating bacterial uptake and lysosomal defense**

Marianne R. Spalinger<sup>1</sup>, PhD; Ali Shawki<sup>1</sup>, PhD; Pritha Chatterjee<sup>1</sup>, MSc; Vinicius Canale<sup>1</sup>, MSc; Alina N. Santos<sup>1</sup>, Anica Sayoc-Becerra<sup>1</sup>, PhD; Michael Scharl<sup>2</sup>, MD; Michel L. Tremblay<sup>3</sup>, PhD; James Borneman<sup>4</sup>, PhD; Declan F. McCole<sup>1</sup>, PhD

*1*Division of Biomedical Sciences, School of Medicine, University of California Riverside, Riverside, California; *2*Department for Gastroenterology and Hepatology, University Hospital and University of Zurich, Zurich, Switzerland; *3*Department of Biochemistry and Goodman Cancer Research Centre, McGill University, Montreal, Quebec, Canada; *4*Department of Microbiology & Plant Pathology, University of California Riverside, Riverside, California

## Supplementary Methods

**Macrophages.** Peripheral blood mononuclear cells (PBMCs) were isolated from healthy controls and IBD patients by density gradient centrifugation on a Ficoll layer (20,000rpm for 20 min. at room temperature), washed twice in ice cold PBS and frozen in FCS containing 10% DMSO. PBMCs were then thawed, washed twice with RPMI (Life Technologies) 10% FCS and CD14<sup>+</sup> cells isolated using the Miltenyi CD14<sup>+</sup> cell isolation kit according to the manufacturer's instructions. Sorted CD14<sup>+</sup> cells were incubated with hM-CSF (Peprotech; 50 ng/ml) and hIL-4 (Peprotech, 250 IU/ml) for 5 days and resulting macrophages used for infection studies.

For differentiation of THP-1 cells into macrophages, 10<sup>6</sup> cells were pulsed for 3 h with 50 ng/ml PMA, washed in serum-free RPMI and incubated for 48 h as described previously[1].

Bone marrow macrophages were prepared as described[1]. In brief, bone marrow was isolated from femori and tibiae, strained through a 70µm nylon mesh and cells incubated in differentiation medium (RPMI containing 1% pen/strep, 1% glutamine, 1% Na-pyruvate, 10 % FCS and 20 % L929 supernatant) for 7 days. On day 4, half of the culture medium was replaced by fresh differentiation medium.

**Immunofluorescence staining.** For immunofluorescence staining, cells were fixed with 4% paraformaldehyde for 10 min at room temperature, washed in PBS and fixed with methanol for 10 min at -20°C. After washing three times with PBS, unspecific antibody binding was blocked by incubation with 10% normal goat serum in Tris-buffered saline with 0.01% Tween-20 (TBS-T) for 2 h at room temperature prior to incubation with anti-LAMP-1 (1:200) or anti-LC3B (1:200) were used as primary antibodies. After washing 3 x in PS-Tween, secondary antibody was applied for 1 h at room temperature, cells washed three times in PBS-Tween and slides mounted with DAPI containing ProlongGold anti-fade mounting medium (Thermo Fisher Scientific). Images were taken on a Leica DM5500B microscope with a DFC450C camera (Leica) or a SP5 confocal microscope (Leica) and processed using the Leica Application Suite AF3.

**RNA isolation.** Cells were washed twice with ice cold PBS, and lysed in RLT buffer (Qiagen) containing 0.25mM DTT for RNA isolation or RIPA buffer (50 mM Tris-Cl, 150mM NaCl, 1% NP-40, 0.5% sodium deoxycholate, 0.1% SDS) for protein isolation. RNA lysates were processed using the RNeasy mini kit from Qiagen according to the manufacturer's instructions and RNA concentration estimated measuring absorbance at 260 and 280 nm. Protein lysates were sonicated on ice for 30 seconds, centrifuged at 13,000g for 10 min and protein containing supernatants transferred to fresh tubes and protein concentrations measured using a BCA kit.

**Western blotting.** For Western blot analyses, equal amount of protein were loaded onto polyacrylamide gels and separated by SDS-PAGE. Proteins were blotted onto PVDF membranes, blocked in 3% milk, 1% BSA in TBS-T (Tris-buffered saline with 0.01% Tween20) prior to incubation with primary antibody overnight. Membranes were then washed three times in TBS-T, incubated with HRP-labeled secondary antibody for 1 h at room temperature, washed 3x with TBS-T and immunoreactive proteins visualized using an enhanced chemiluminescence kit (Thermo Fisher Scientific) and x-ray films (GE Healthcare Systems).

**Quantitative PCR.** Complementary DNA (cDNA) synthesis was performed using the qScript cDNA synthesis kit from Quantabio (Beverly, MA) following the manufacturer's instructions. Real-time PCR was performed using iQ SYBR Green Supermix (Bio-Rad, Hercules, CA) on a C1000 Thermal cycler equipped with a CFX96 Real-Time PCR system using BioRad CFX Manager 3.1 Software. Measurements were performed in triplicates, mouse GAPDH was used as endogenous control, and results were analyzed by the  $\Delta\Delta CT$  method. The real-time PCR contained an initial enzyme activation step (3 min, 95 °C) followed by 45 cycles consisting of a denaturing (95 °C, 10 seconds), an annealing (53°-60°C, 10 seconds) and an extending (72 °C, 10 seconds) step. The used primers are listed in the Key Resources Table.

1 Spalinger MR, Kasper S, Gottier C, Lang S, Atrott K, Vavricka SR, *et al.* NLRP3 tyrosine phosphorylation is controlled by protein tyrosine phosphatase PTPN22. *The Journal of Clinical Investigation* 2016;**126**.

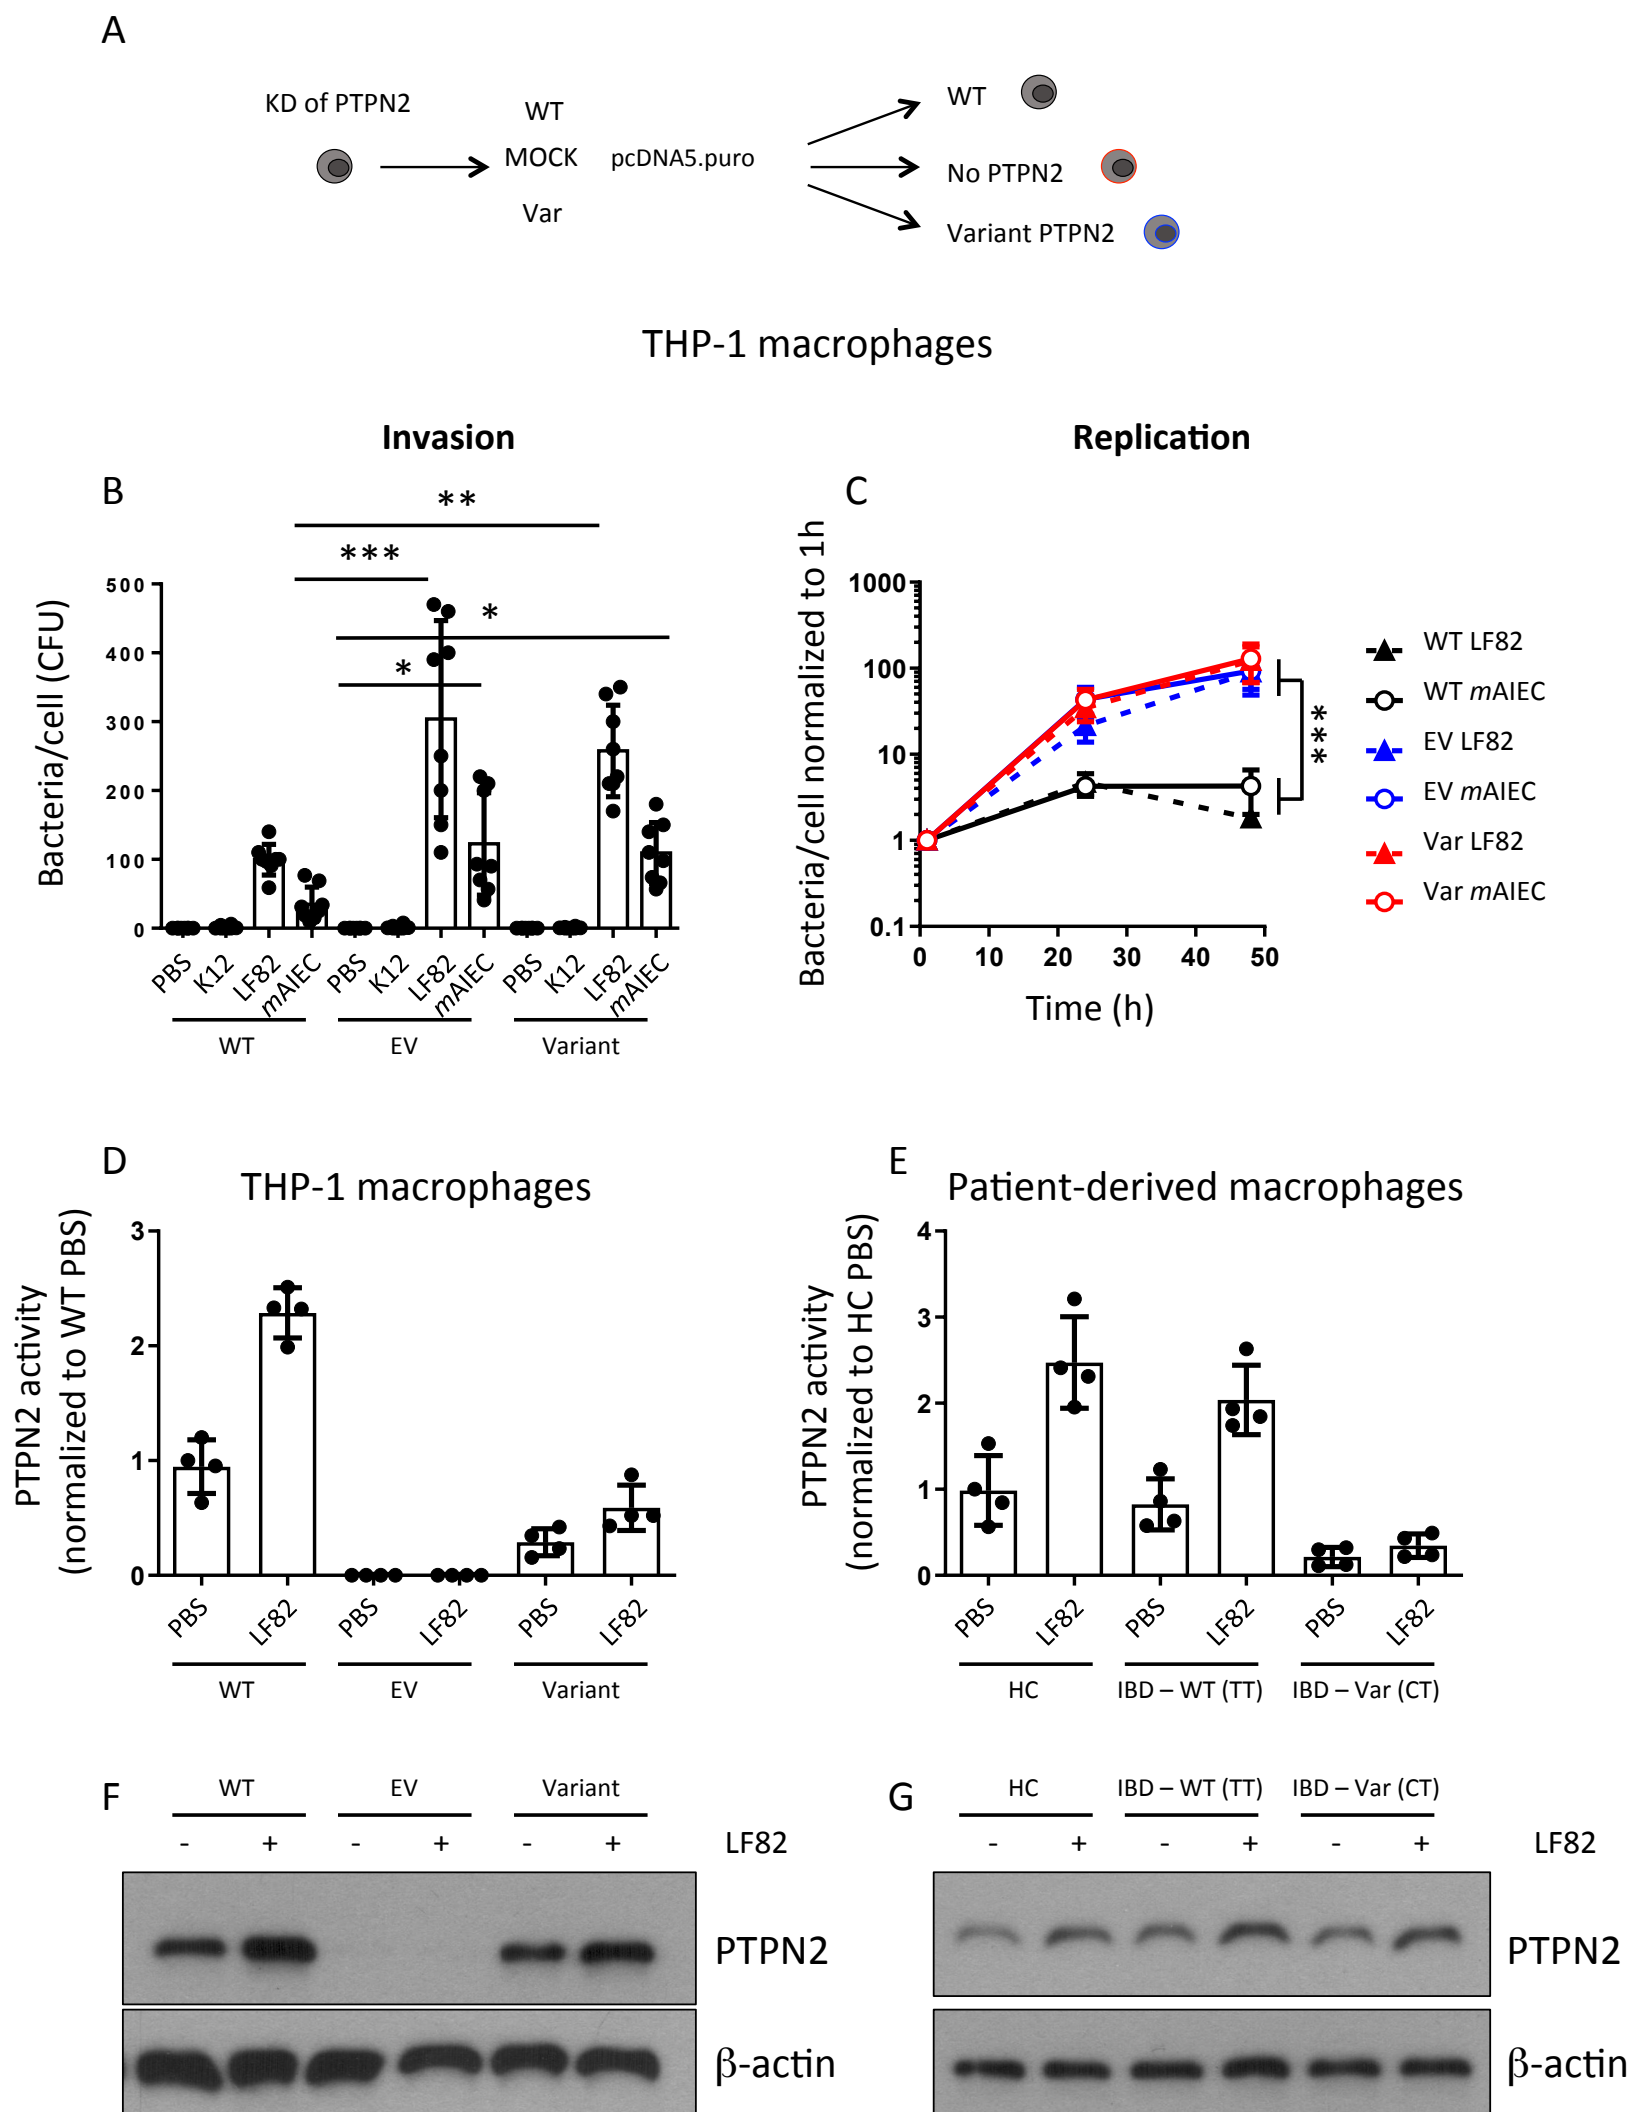

**Supplementary Figure 1. Loss of PTPN2 promotes uptake and replication of AIEC in macrophages.** *PTPN2* was knocked down in THP-1 cells prior to transfection with lentiviral particles containing an empty vector (EV), WT *PTPN2* (WT) or Variant *PTPN2* (Variant) as described in [22]. **A**) Schematic overview of the used cells; **B**) the cells were infected with non-invasive K12 *E. coli* or the AIEC strain LF82 for 2 h, washed with PBS and incubated with gentamycin and macrophage uptake analyzed after 1h. **C**) Bacterial replication at the indicated time-points in cells treated as in B). **D-G**) THP-1 cells (D+F) or patient derived macrophages (E+G) were infected with LF82 and analyzed for *PTPN2* activity (D+E) and *PTPN2* protein expression (F+G). \*= $p < 0.05$ , \*\*= $p < 0.01$ , \*\*\*= $p < 0.001$ , ANOVA. Related to Figure 1.

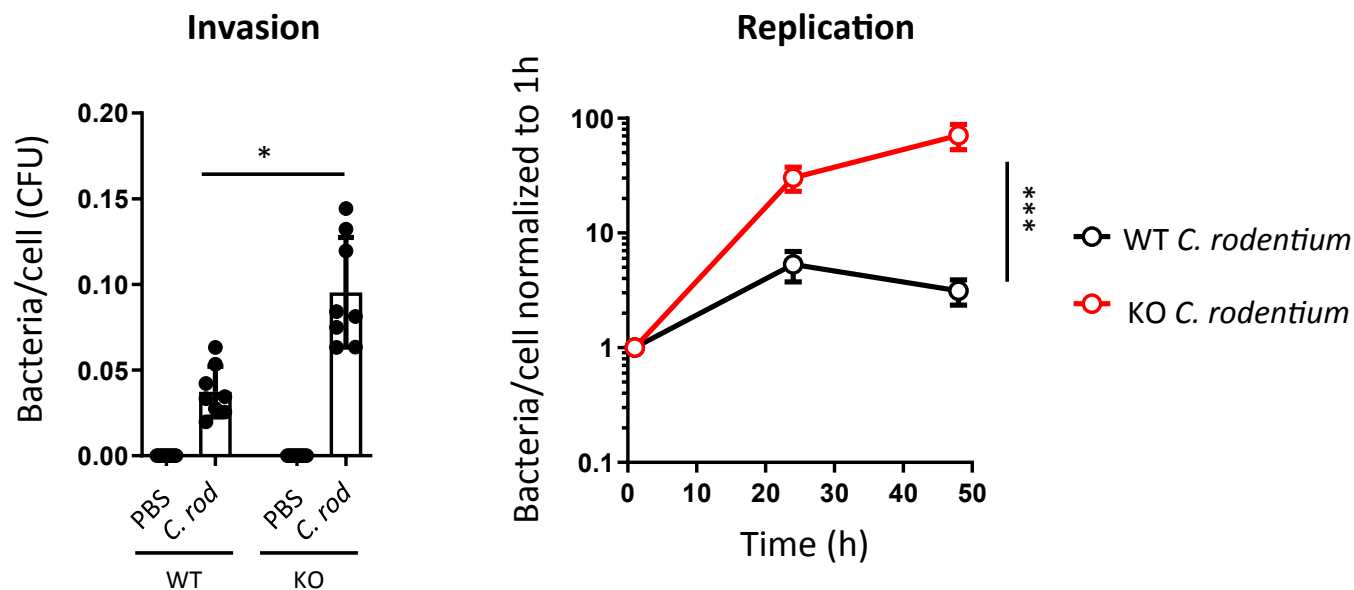

**Supplementary Figure 2. Loss of PTPN2 promotes uptake and replication of *C. rodentium* in macrophages.** Peritoneal macrophages from WT, and *Ptpn2*-KO (KO) mice were infected with *C. rodentium* and analyzed for **A**) bacterial uptake after 1h, and **B**) bacterial replication at the indicated time points. \*= $p < 0.05$ , \*\*\*= $p < 0.001$ , ANOVA. Related to Figure 1.

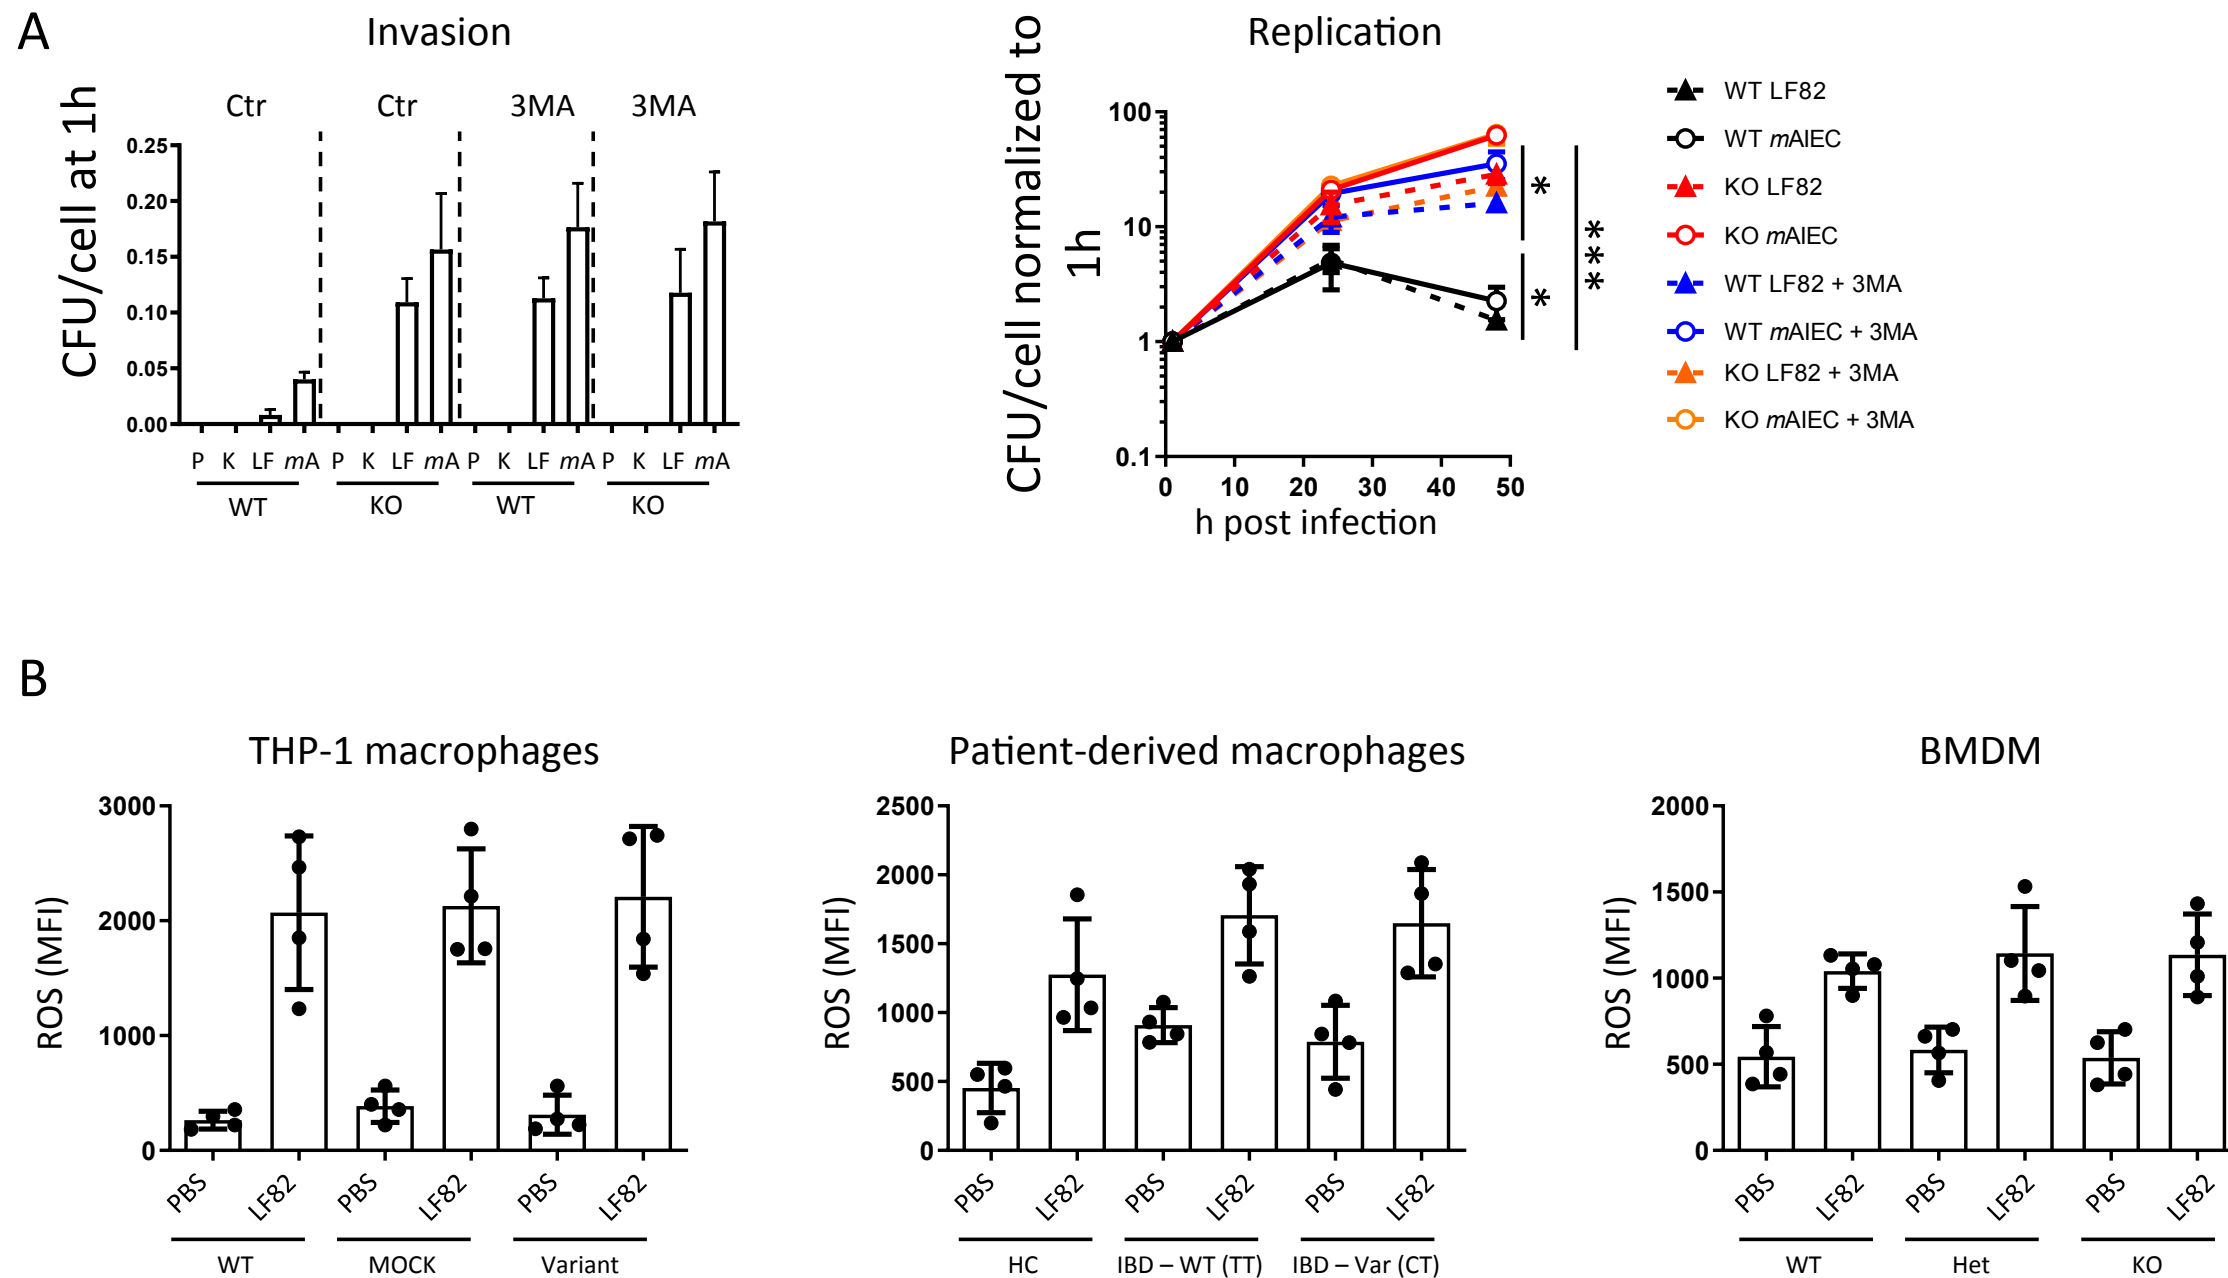

**Supplementary Figure 3. Suppression of autophagy promotes bacterial replication in WT macrophages. A)** Peritoneal macrophages from WT, and *Ptpn2*-KO (KO) mice were incubated for 1 h with 3-Methyladenine (3-MA) prior to infection with *mAIEC* and analysis of bacterial uptake after 1h and bacterial replication at the indicated time. P: PBS, K: K12, LF: LF82, *mA*: *mAIEC*. **B)** *PTPN2*-knockdown THP-1 cells expressing WT *PTPN2*, an empty vector (EV) or Variant *PTPN2*; monocyte derived macrophages from healthy controls (HC) or IBD patients being WT (WT) or heterozygous carriers of the *PTPN2* Variant (Var); and bone marrow derived macrophages (BMDM) from *Ptpn2*-WT (WT) *Ptpn2*-Het (HET), or *Ptpn2*-KO (KO) mice were infected with LF82 and ROS production measured by flow cytometry. \*= $p < 0.05$ , \*\*\*= $p < 0.001$ , ANOVA. Related to Figure 4.

A

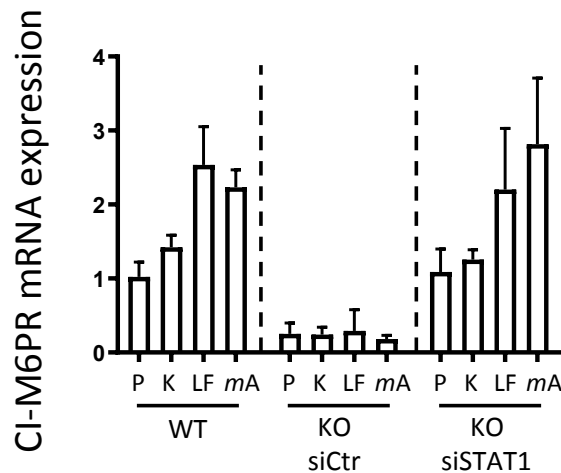

B

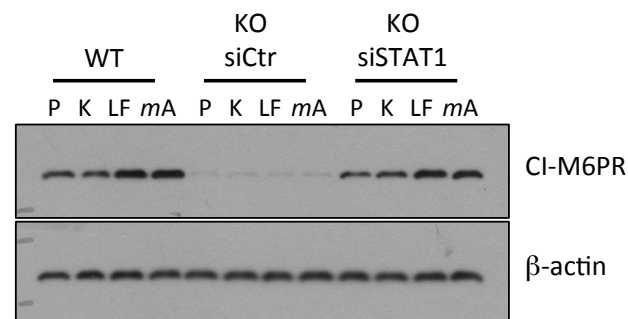

C

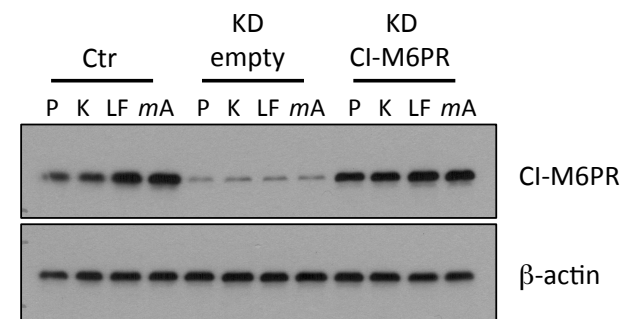

**Supplementary Figure 4. STAT1 silencing restores CI-M6PR expression in *Ptpn2*-deficient macrophages. A+B:** BMDM from *Ptpn2*-WT (WT) and *Ptpn2*-KO (KO) mice were treated with STAT1 siRNA for 24 h prior to infection with K12 (K), LF82 (LF) or *mAIEC* (*mA*) and analyzed for CI-M6PR **A**) mRNA and **B**) protein expression. **C**) THP-1 cells expressing PTPN2-specific shRNA were transfected with an empty vector (empty) or a CI-M6PR overexpressing vector prior to infection with K12 (K), LF82 (LF) or *mAIEC* (*mA*) and analyzed for CI-M6PR protein expression. P: PBS, K: K12, LF: LF82, *mA*: *mAIEC*. Related to Figure 6.



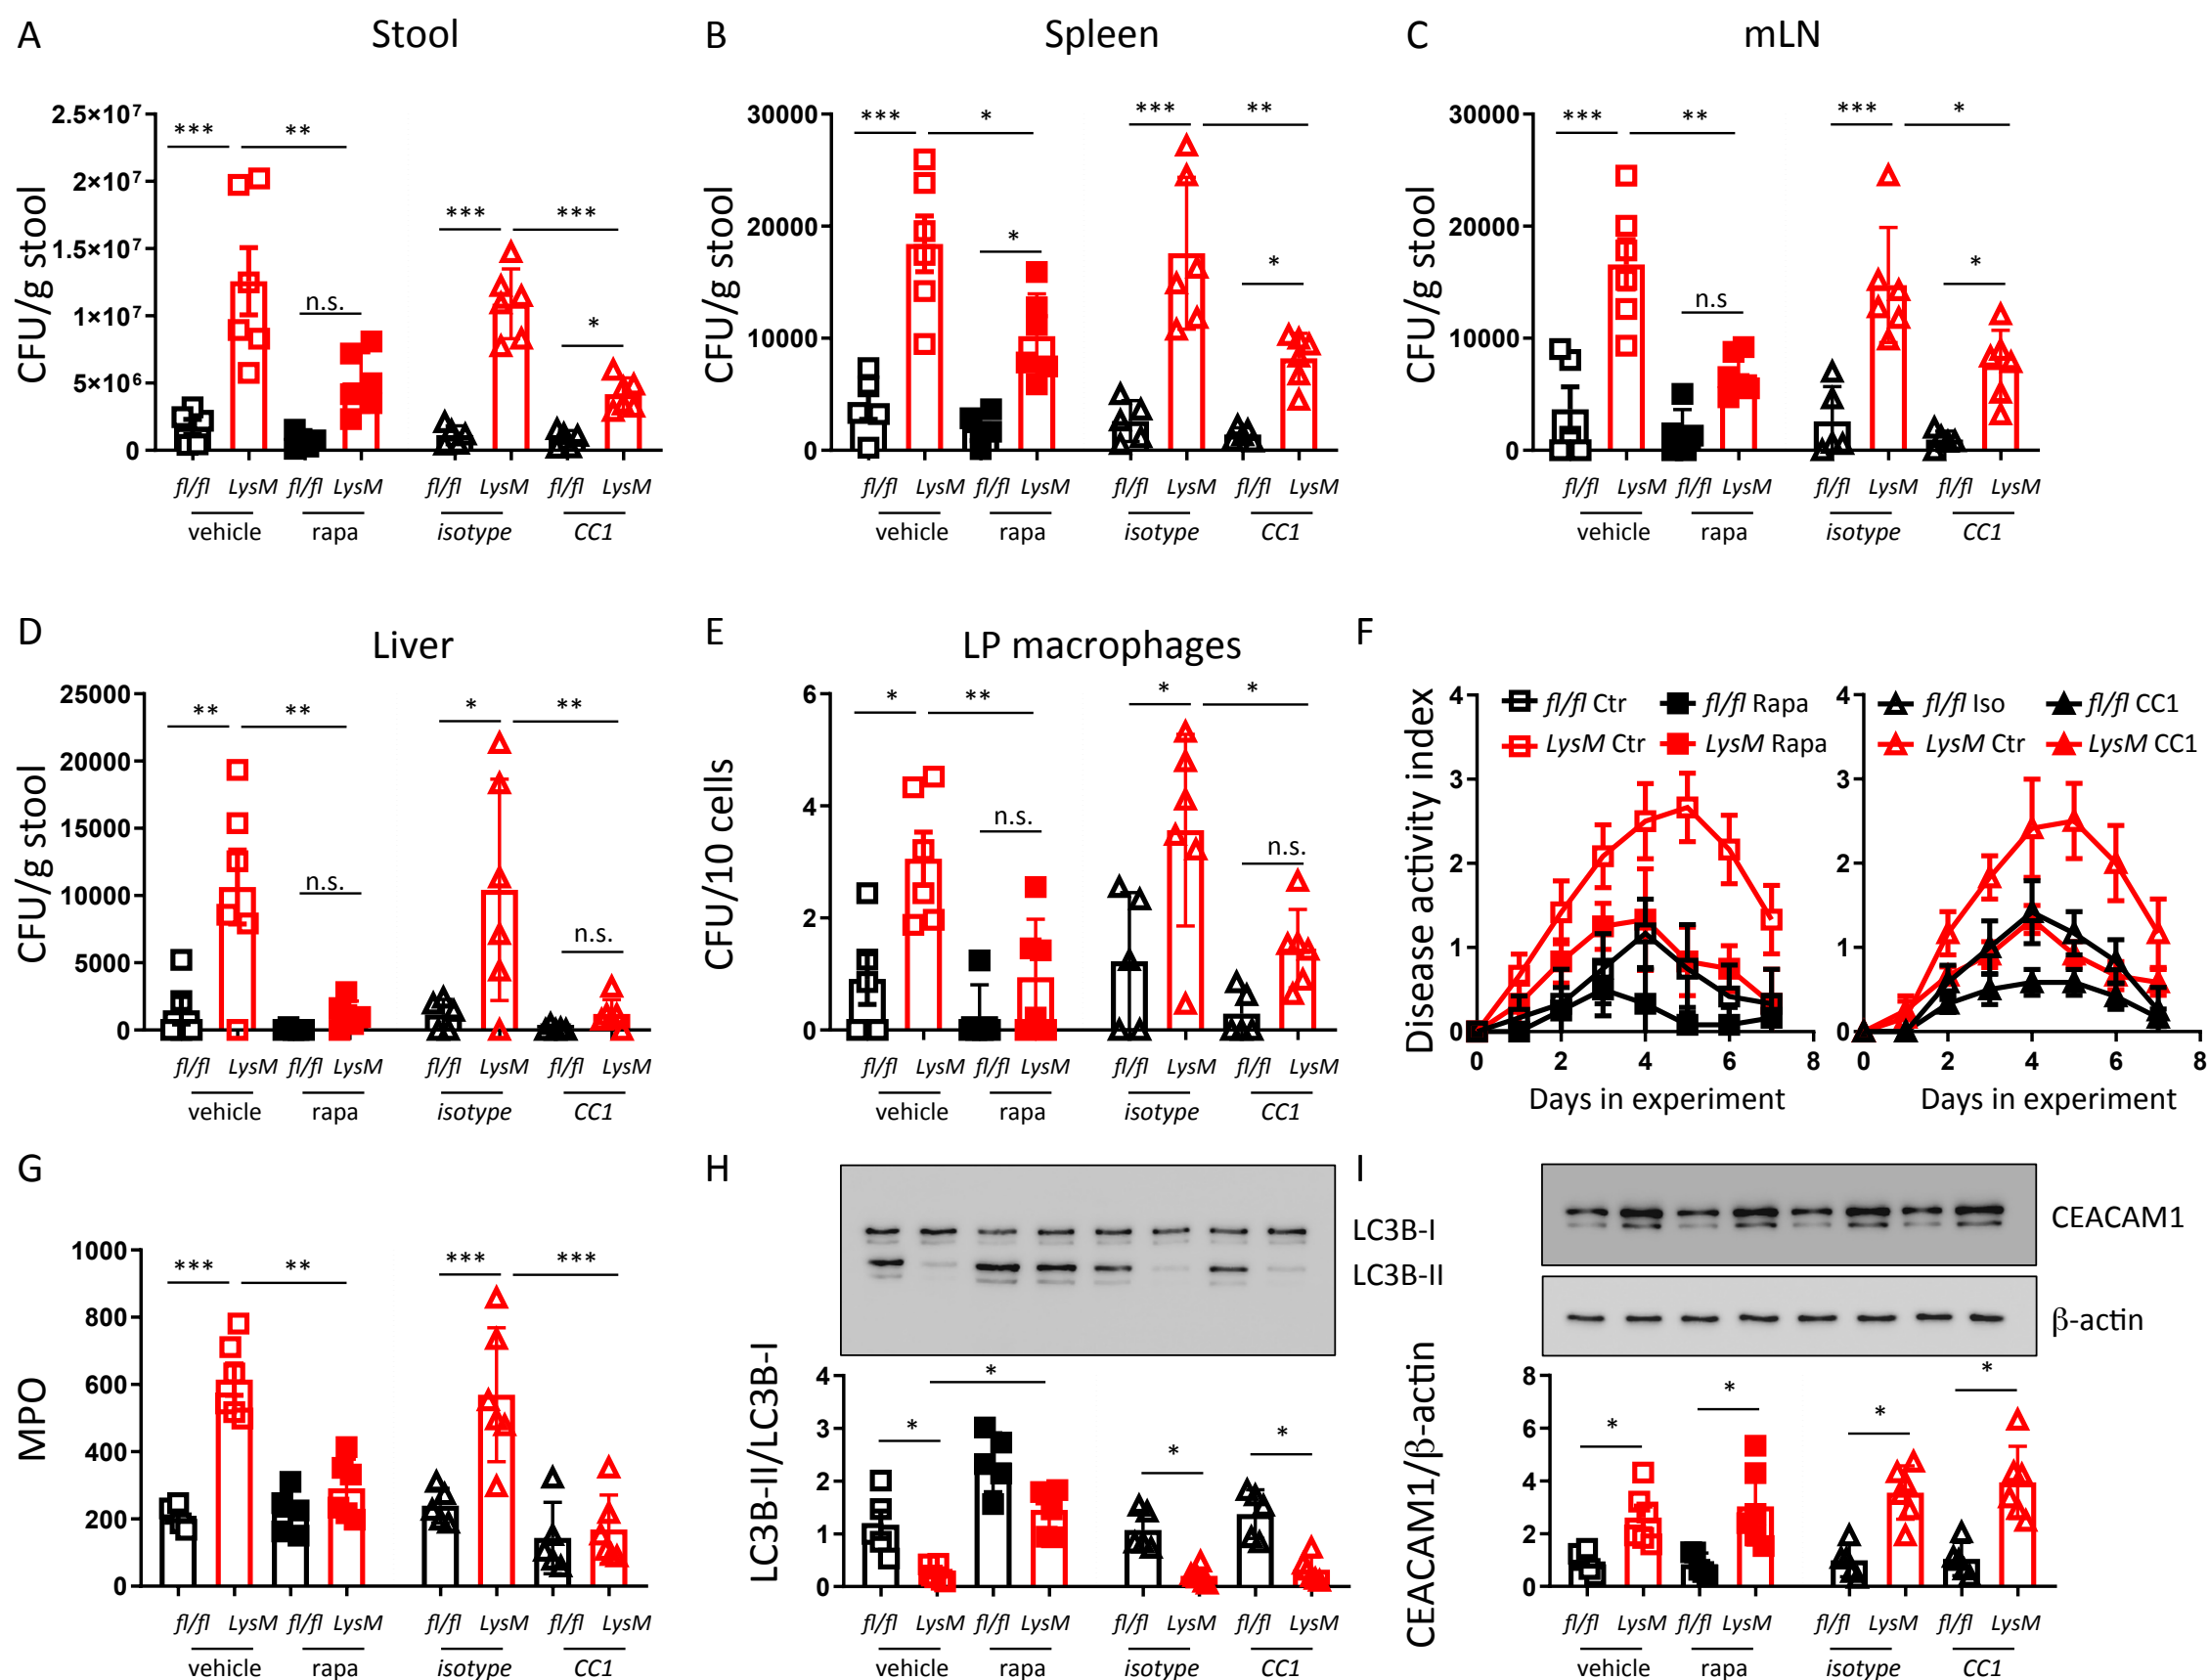

**Supplementary Figure 5. Autophagy induction and CEACAM-1 inhibition partially rescue the increased susceptibility to *mAIEC* in *Ptpn2*-LysMCre mice.** *Ptpn2*<sup>fl/fl</sup> and *Ptpn2*-LysMCre littermates were orally infected for 4 days with 10<sup>9</sup> *mAIEC* and treated daily with vehicle or rapamycin (rapa), or with an isotype control (isotype) or a CEACAM-1 blocking antibody (CC1) and *E. coli* load in **A**) the stool at day 5, **B**) in the spleen, **C**) mesenteric lymph nodes, **D**) the liver, and **E**) lamina propria macrophages determined by plating on LB agar plates. **F**) Disease activity index (DAI) over the course. **G**) Myeloperoxidase levels. Representative pictures and densitometry of **H**) LC3B-II normalized to LC3B-I, and **I**) CEACAM-1 normalized to β-actin. \*=*p*<0.05, \*\*=*p*<0.01, \*\*\*=*p*<0.001, ANOVA.

| REAGENT                                                      | SOURCE                                                                                  | Catalogue number or Reference                                            |
|--------------------------------------------------------------|-----------------------------------------------------------------------------------------|--------------------------------------------------------------------------|
| <b>Antibodies</b>                                            |                                                                                         |                                                                          |
| CEACAM6 mouse monoclonal (9A6)                               | Abcam                                                                                   | Ab78029                                                                  |
| CEACAM1 rabbit monoclonal (D1P4T)                            | Cell signaling                                                                          | 14771                                                                    |
| Rabbit anti p-STAT1 rabbit monoclonal (58D6)                 | Cell signaling                                                                          | 9167                                                                     |
| Rabbit anti total STAT1 rabbit monoclonal (42H3)             | Cell signaling                                                                          | 9175                                                                     |
| TCPTP mouse monoclonal (F4-1D)                               | EMD Millipore                                                                           | PH03L-100UL                                                              |
| $\beta$ -actin rabbit monoclonal (D6A8)                      | Cell signaling                                                                          | 8457                                                                     |
| ATG16L1 (rabbit monoclonal (D6D5)                            | Cell signaling                                                                          | 8089                                                                     |
| p62 (mouse and human)                                        |                                                                                         |                                                                          |
| LC3B mouse monoclonal (E5Q2K)                                | Cell signaling                                                                          | 83506                                                                    |
| LAMP1 Rat monoclonal (1D4B)                                  | Invitrogen                                                                              | 14-1071-82                                                               |
| M6PR-CI rabbit monoclonal (EPR6599)                          | Abcam                                                                                   | Ab124767                                                                 |
| HRP-conjugated anti-mouse                                    | Jackson Immunosearch                                                                    | 115-036-062                                                              |
| HRP-conjugated anti-rabbit                                   | Jackson Immunosearch                                                                    | 111-036-045                                                              |
| AlexaFluor488-conjugated anti-rat                            | Jackson Immunosearch                                                                    | 712-546-153                                                              |
|                                                              |                                                                                         |                                                                          |
| <b>Bacterial and Virus Strains</b>                           |                                                                                         |                                                                          |
| E.Coli-K12                                                   | ATCC                                                                                    | 25404                                                                    |
| E.Coli- <i>m</i> AIEC                                        | Own lab                                                                                 | Published in (Shawki et al., 2019)                                       |
| E.Coli-LF82                                                  | A. Darfeuille-Michaud/Nicholas Barnich, Université d'Auvergne, Clermont-Ferrand, France | Published in (Darfeuille-Michaud et al., 2004)                           |
|                                                              |                                                                                         |                                                                          |
| <b>Biological Samples</b>                                    |                                                                                         |                                                                          |
| Human patient derived macrophages                            | M. Scharl, University Hospital Zurich                                                   | Published in (Niechcial et al., 2020) Supplementary Table S2 for details |
|                                                              |                                                                                         |                                                                          |
| <b>Chemicals, Peptides, and Recombinant Proteins</b>         |                                                                                         |                                                                          |
| Rapamycin                                                    | EMD Millipore                                                                           | 553210-100UG                                                             |
| iQ SYBR Green Supermix                                       | Bio-Rad                                                                                 | 1708882                                                                  |
| Lutheria-Bertani medium                                      |                                                                                         |                                                                          |
| Agarose                                                      |                                                                                         |                                                                          |
| Ficoll                                                       | GE Healthcare Life Sciences                                                             | 17144002                                                                 |
| DMSO                                                         | Dimethyl sulfoxide                                                                      | 276855-100ML                                                             |
| hM-CSF                                                       | PeprTech                                                                                | 300-25                                                                   |
| hIL-4                                                        | PeprTech                                                                                | 200-04                                                                   |
| Phorbol 12-Myristate 13-Acetat (PMA)                         | Sigma-Aldrich                                                                           | P8139-5MG                                                                |
| RPMI 1640                                                    | Corning                                                                                 | 10-040-CV                                                                |
| Gentamicin                                                   | Sigma-Aldrich                                                                           | G1397-10ML                                                               |
| PVDF membranes                                               | EMD Millipore                                                                           | IPVH00010                                                                |
| Bovine serum albumin (BSA)                                   | Sigma-Aldrich                                                                           | A9418-100G                                                               |
|                                                              |                                                                                         |                                                                          |
| <b>Commercial Assays</b>                                     |                                                                                         |                                                                          |
| pHrodo™ Red E. coli BioParticles™ Conjugate for Phagocytosis | Thermo Fisher Scientific                                                                | P35361                                                                   |

|                                                        |                                        |                                       |
|--------------------------------------------------------|----------------------------------------|---------------------------------------|
| CD14 MicroBeads, human                                 | Miltenyi Biotec                        | 130-050-201                           |
| RNeasy Mini Kit                                        | Qiagen                                 | 74106                                 |
| Thermo Scientific Pierce BCA Protein Assay             | Thermo Fisher Scientific               | 23228                                 |
| SuperSignal™ West Pico PLUS Chemiluminescent Substrate | Thermo Fisher Scientific               | 34577                                 |
| qScript cDNA Synthesis Kit                             | Quantabio                              | 95074-100                             |
| <b>Cell Lines</b>                                      |                                        |                                       |
| THP-1 MOCK                                             | Scharl lab, University Hospital Zurich | Published in (Scharl et al., 2012a)   |
| THP-1 WT                                               | Scharl lab, University Hospital Zurich | Published in (Scharl et al., 2012a)   |
| THP-1 Var                                              | Scharl lab, University Hospital Zurich | Published in (Scharl et al., 2012a)   |
| NCTC clone 929 (L929 cells)                            | ATCC                                   | ATCC® CCL-1™                          |
| THP-1 cells                                            | ATCC                                   | ATCC® TIB-202™                        |
| <b>Mice</b>                                            |                                        |                                       |
| Balb/c PTPN2 KO mice                                   | M. L. Tremblay, McGill University      | Published in (You-Ten et al., 1997)   |
| PTPN2-LysMCre mice                                     | Scharl lab, University Hospital Zurich | Published in (Spalinger et al., 2018) |
| <b>Oligonucleotides</b>                                |                                        |                                       |
| STAT1 siRNA                                            | Dharmacon                              | L-003543-00-0005                      |
| Non-targeting siRNA                                    | Dharmacon                              | D-001810-10-05                        |
| Primers for qPCR                                       | IDT                                    | Details in supplementary Table S2     |
| <b>Recombinant DNA</b>                                 |                                        |                                       |
| mCherry plasmid (pKB4985)                              | Lo Lab, University of Riverside        | n/a                                   |

**Supplementary Table 1:** Materials used in this manuscript.

| Patient # | Genotype | Sex | Age | Diagnosis          | Medication                                           |
|-----------|----------|-----|-----|--------------------|------------------------------------------------------|
| 1         | WT (TT)  | M   | 63  | Crohns Disease     | Budenofalk, Humira                                   |
| 2         | TG (CT)  | M   | 35  | Ulcerative Colitis | No disease specific medication                       |
| 3         | TG (CT)  | M   | 40  | Crohns Disease     | Cimzia (Certolizumab pegol), Puri-Nethol, Budenofalk |
| 4         | WT (TT)  | M   | 40  | Crohns Disease     | Colosan, Infliximab                                  |
| 5         | WT (TT)  | W   | 39  | Ulcerative Colitis | Entyvio (Vedolizumab)                                |
| 6         | WT (TT)  | W   | 47  | Ulcerative Colitis | Entyvio (Vedolizumab)                                |
| 7         | TG (CT)  | M   | 62  | Crohn's Disease    | Entyvio (Vedolizumab), Salofalk (Mesalazine)         |
| 8         | TG (CT)  | M   | 45  | Ulcerative Colitis | Salofalk (Mesalazine)                                |
| 9         | WT (TT)  | W   | 39  | Ulcerative Colitis | Entyvio (Vedolizumab)                                |
| 10        | TG (CT)  | W   | 42  | Ulcerative Colitis | Entyvio (Vedolizumab)                                |
| 11        | WT (TT)  | W   | 62  | Crohn's Disease    | Entyvio (Vedolizumab), Salofalk (Mesalazine)         |
| 12        | WT (TT)  | M   | 57  | Crohn's Disease    | Salofalk (Mesalazine)                                |
| 13        | TG (CT)  | W   | 54  | Crohn's Disease    | Entyvio (Vedolizumab), Salofalk (Mesalazine)         |
| 14        | TG (CT)  | M   | 61  | Crohn's Disease    | Salofalk (Mesalazine)                                |
| 15        | WT (TT)  | M   | 42  | Crohn's Disease    | Colosan, Infliximab                                  |
| 16        | WT (TT)  | W   | 52  | Ulcerative Colitis | No disease specific medication                       |
| 17        | TG (CT)  | W   | 44  | Ulcerative Colitis | No disease specific medication                       |
| 18        | WT (TT)  | W   | 39  | Healthy control    | n/a                                                  |
| 19        | WT (TT)  | M   | 45  | Healthy control    | n/a                                                  |
| 20        | WT (TT)  | M   | 40  | Healthy control    | n/a                                                  |
| 21        | TG (CT)  | W   | 51  | Healthy control    | n/a                                                  |
| 22        | TG (CT)  | W   | 39  | Healthy control    | n/a                                                  |

**Supplementary Table 2:** Patient characteristics.
